# Supplementary material for: The Effect of Anticoagulants, Temperature, and Time on the Human Plasma Metabolome and Lipidome from Healthy Donors as Determined by Liquid Chromatography-Mass Spectrometry
Source: MDPI journal article supplement (doi:10.3390/biom9050200), 2019-05-23

Supplementary material 5: A) Base peak ion chromatogram representing separation of different lipid species in positive ionization mode

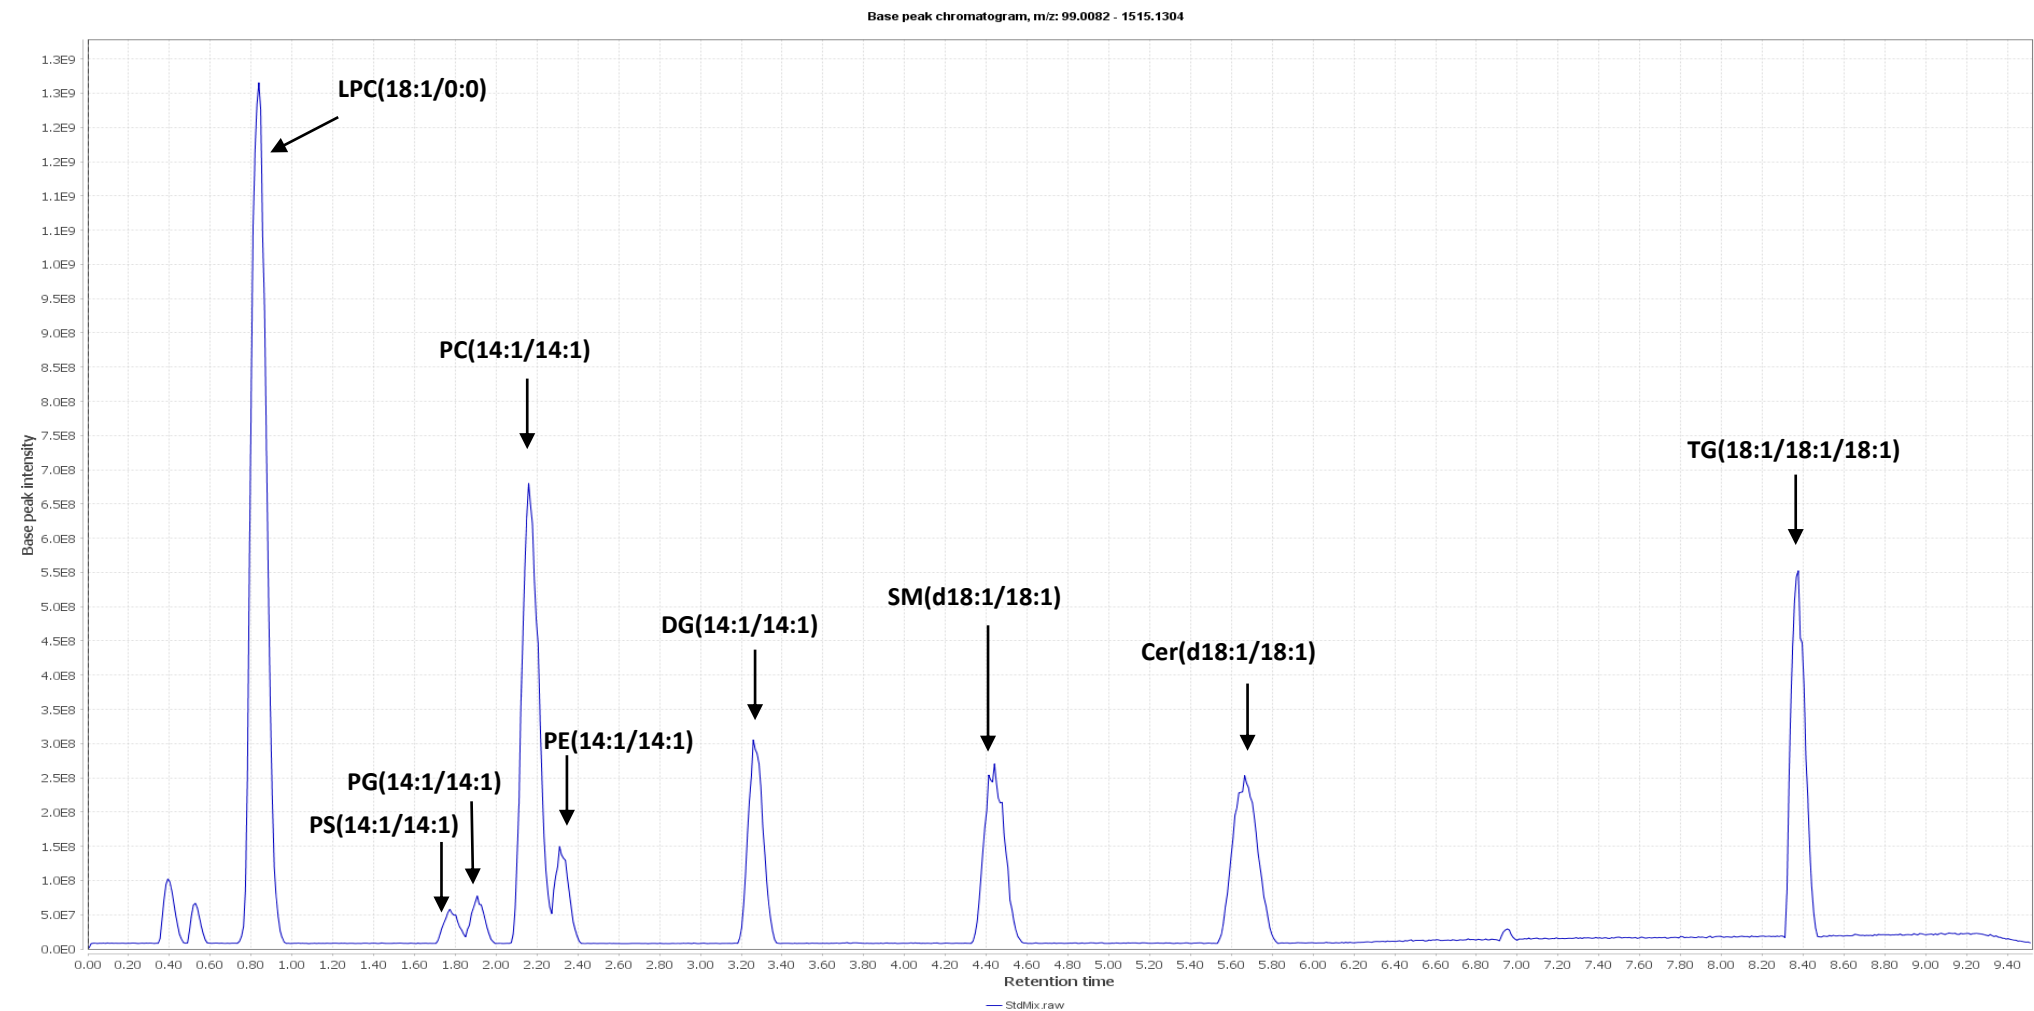

Supplementary material 5: B) Base peak ion chromatogram for D11\_0H\_CPT plasma in positive ionization mode lipidomics data

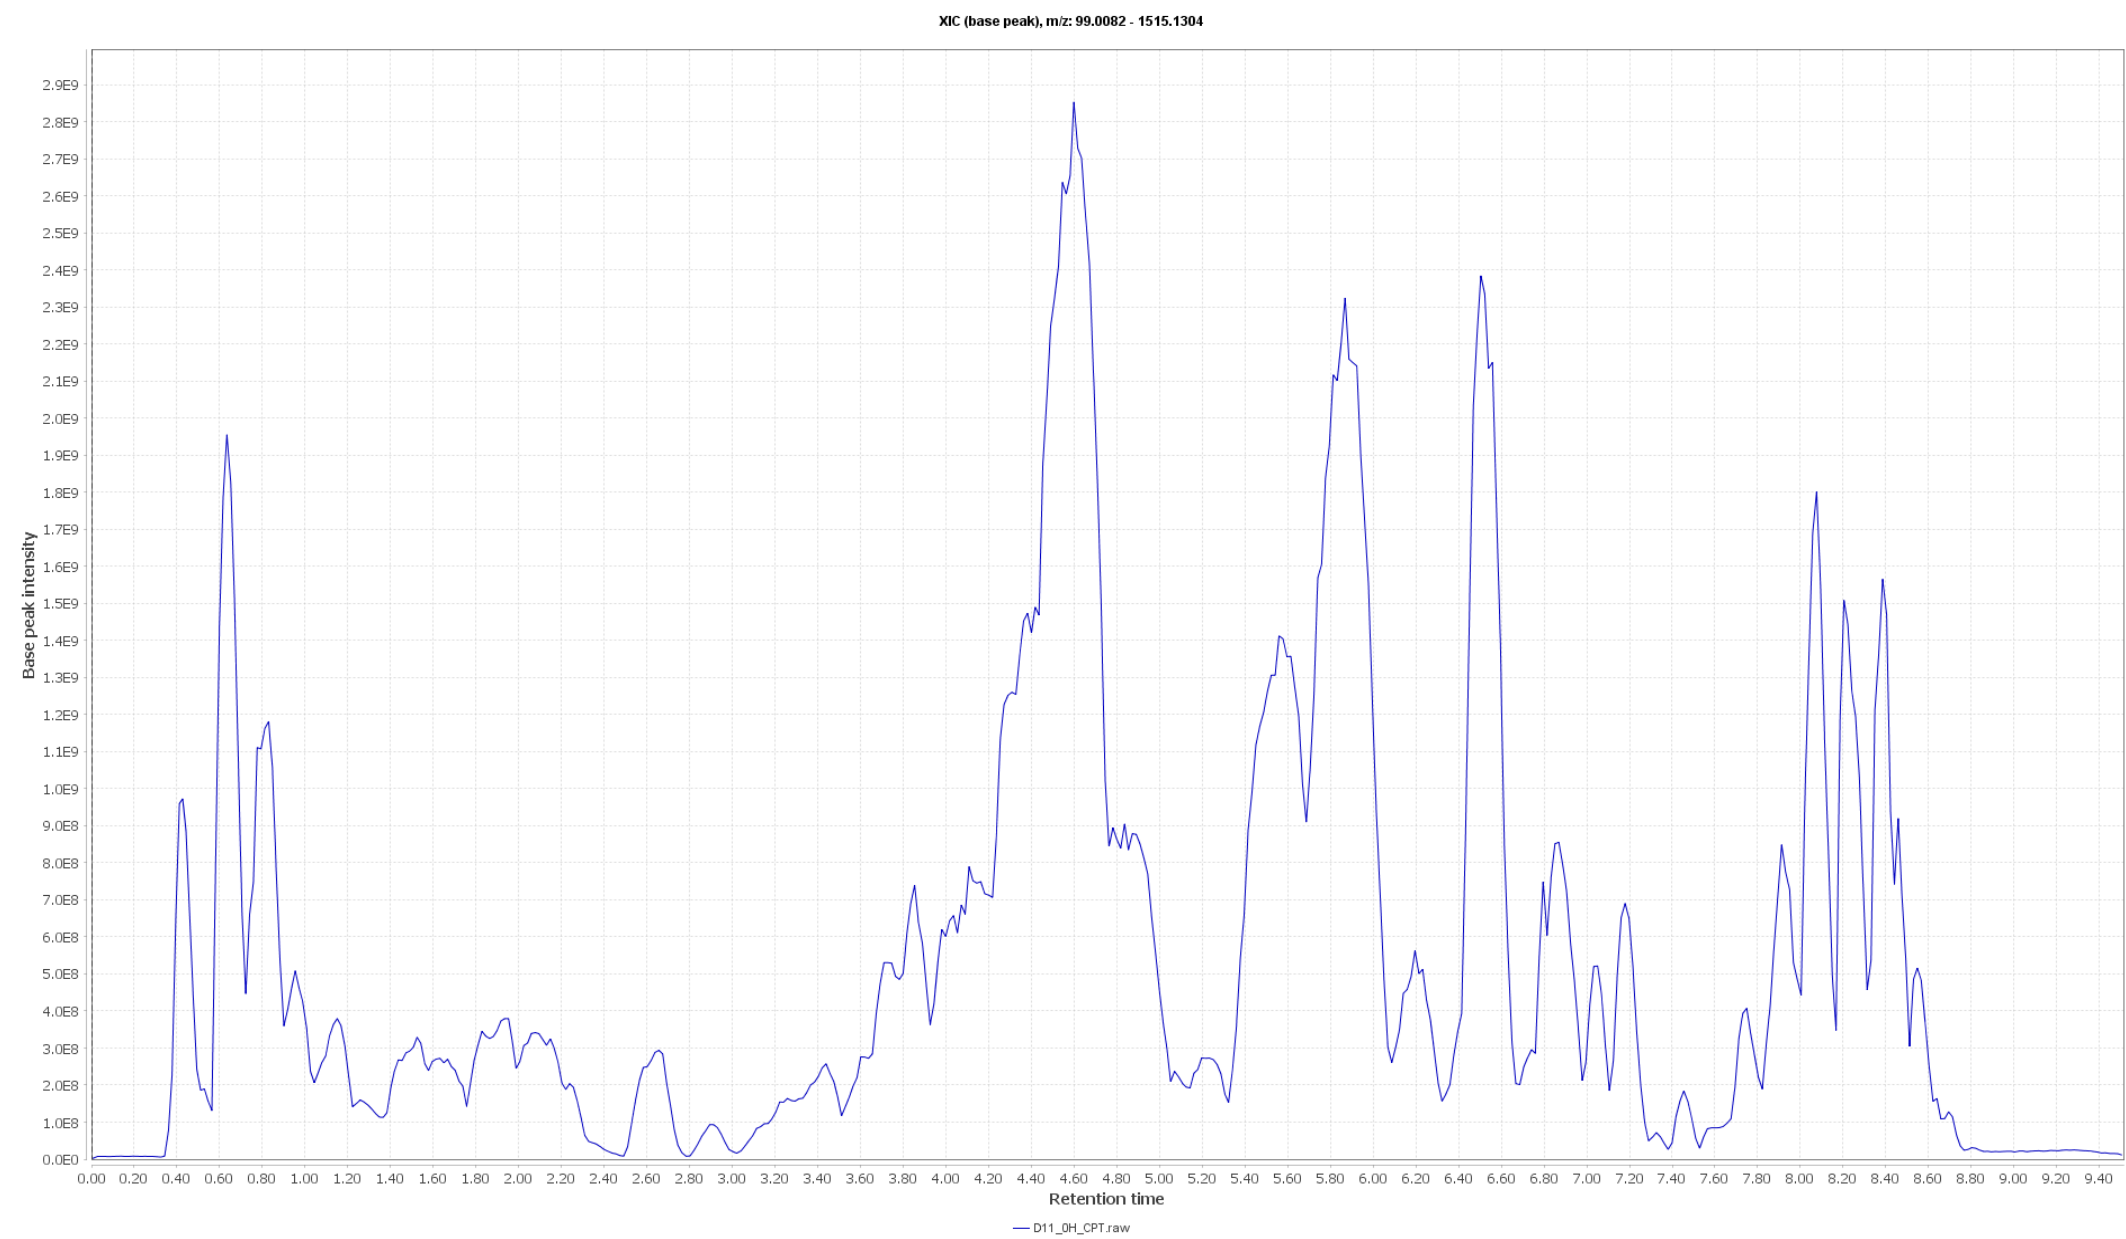

Supplementary material 5: C) Base peak ion chromatogram for D11\_0H\_CPT plasma in negative ionization mode lipidomicd data

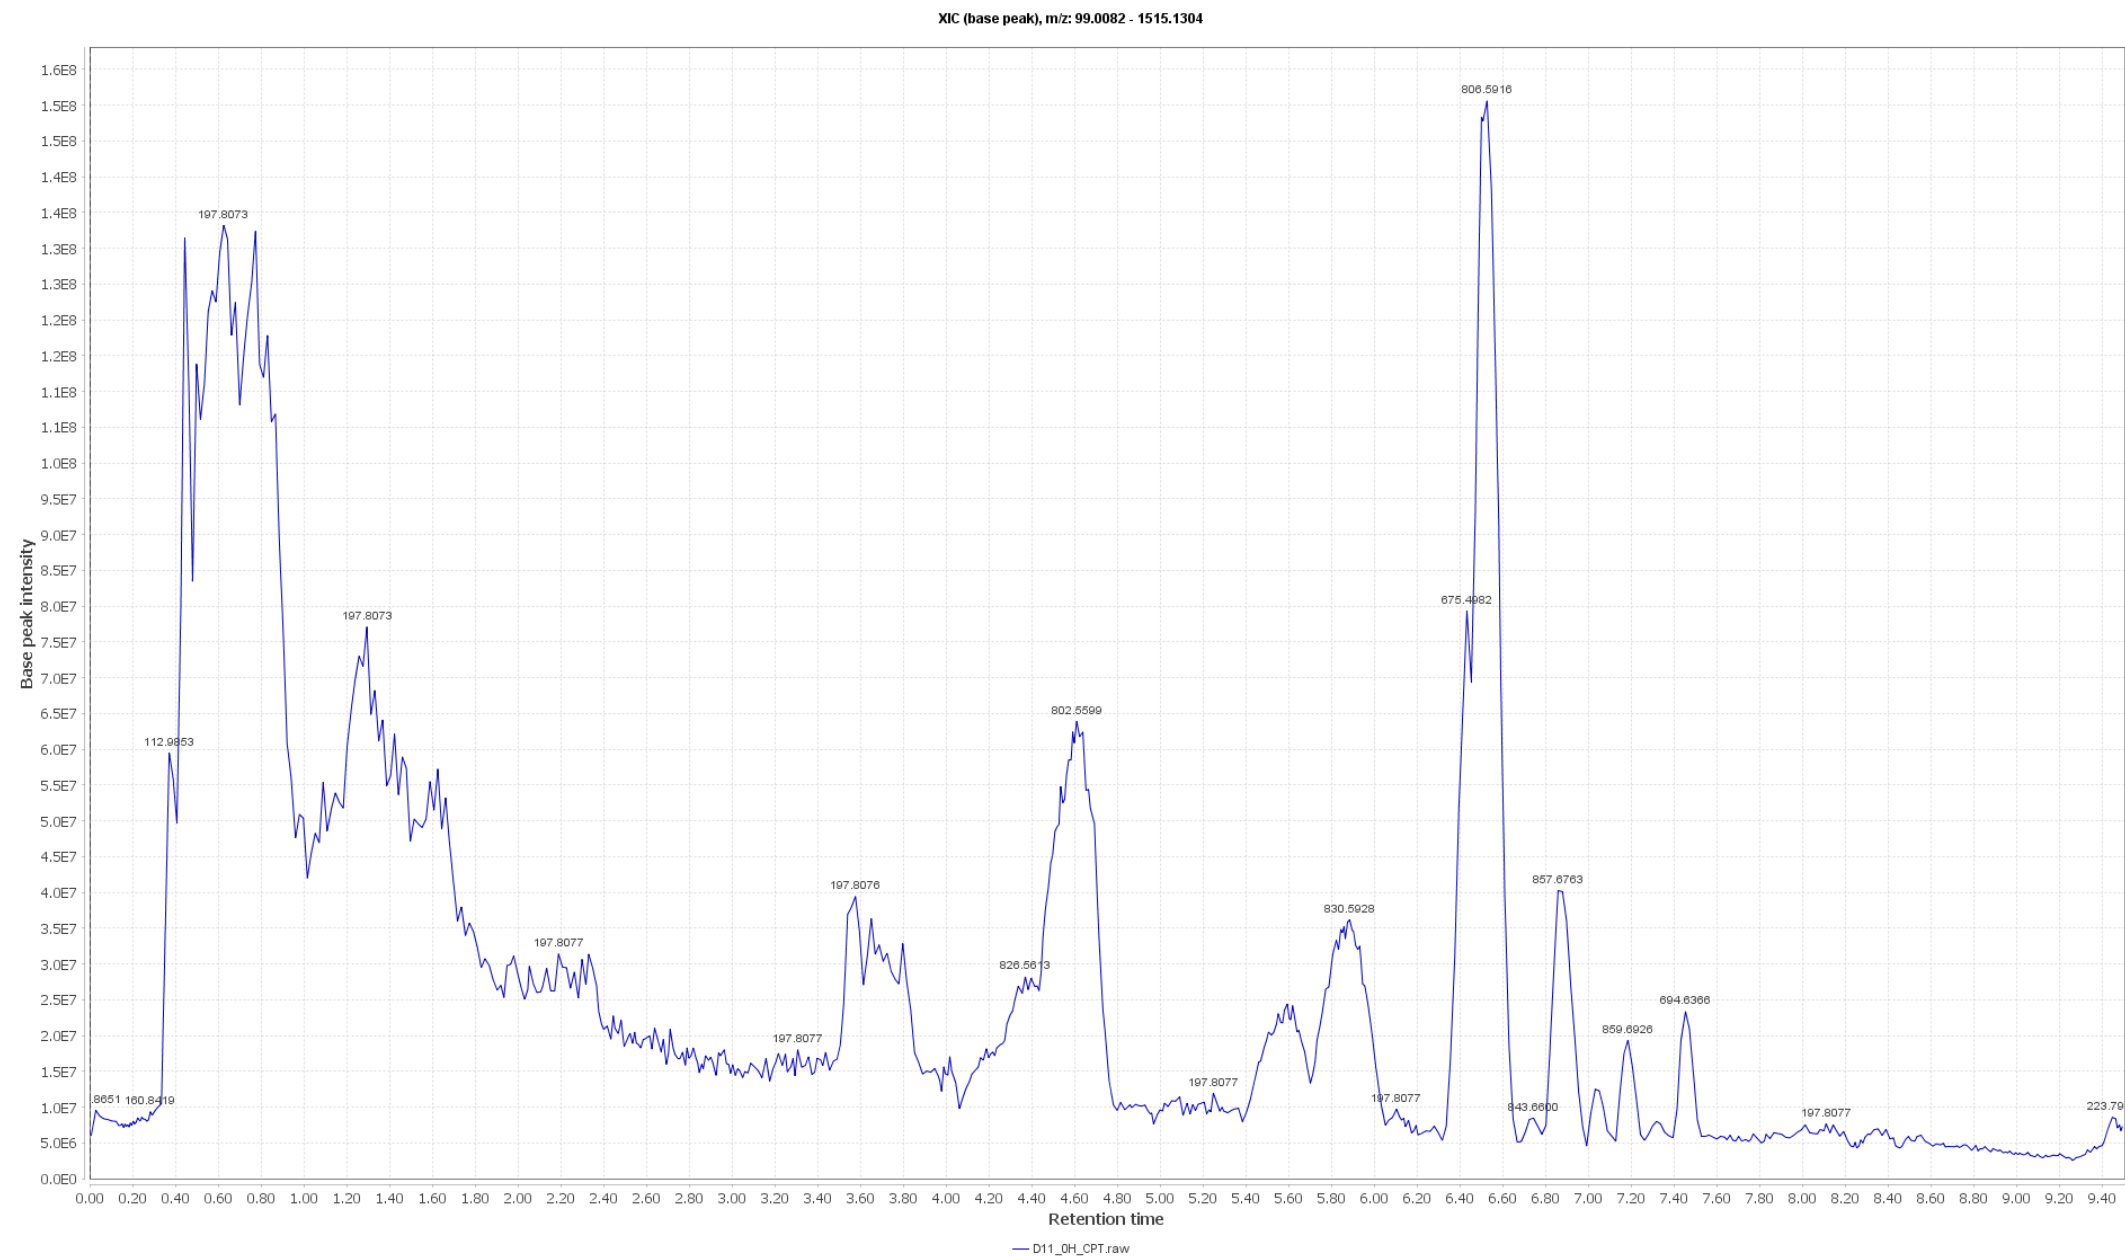

Supplement: s1 [file s1]
