# Supplementary material for: The Effect of Anticoagulants, Temperature, and Time on the Human Plasma Metabolome and Lipidome from Healthy Donors as Determined by Liquid Chromatography-Mass Spectrometry
Source: MDPI journal article supplement (doi:10.3390/biom9050200), 2019-05-23

Supplementary material 6: Base peak ion chromatogram for NIST SRM1950 in positive ionization mode metabolomics data

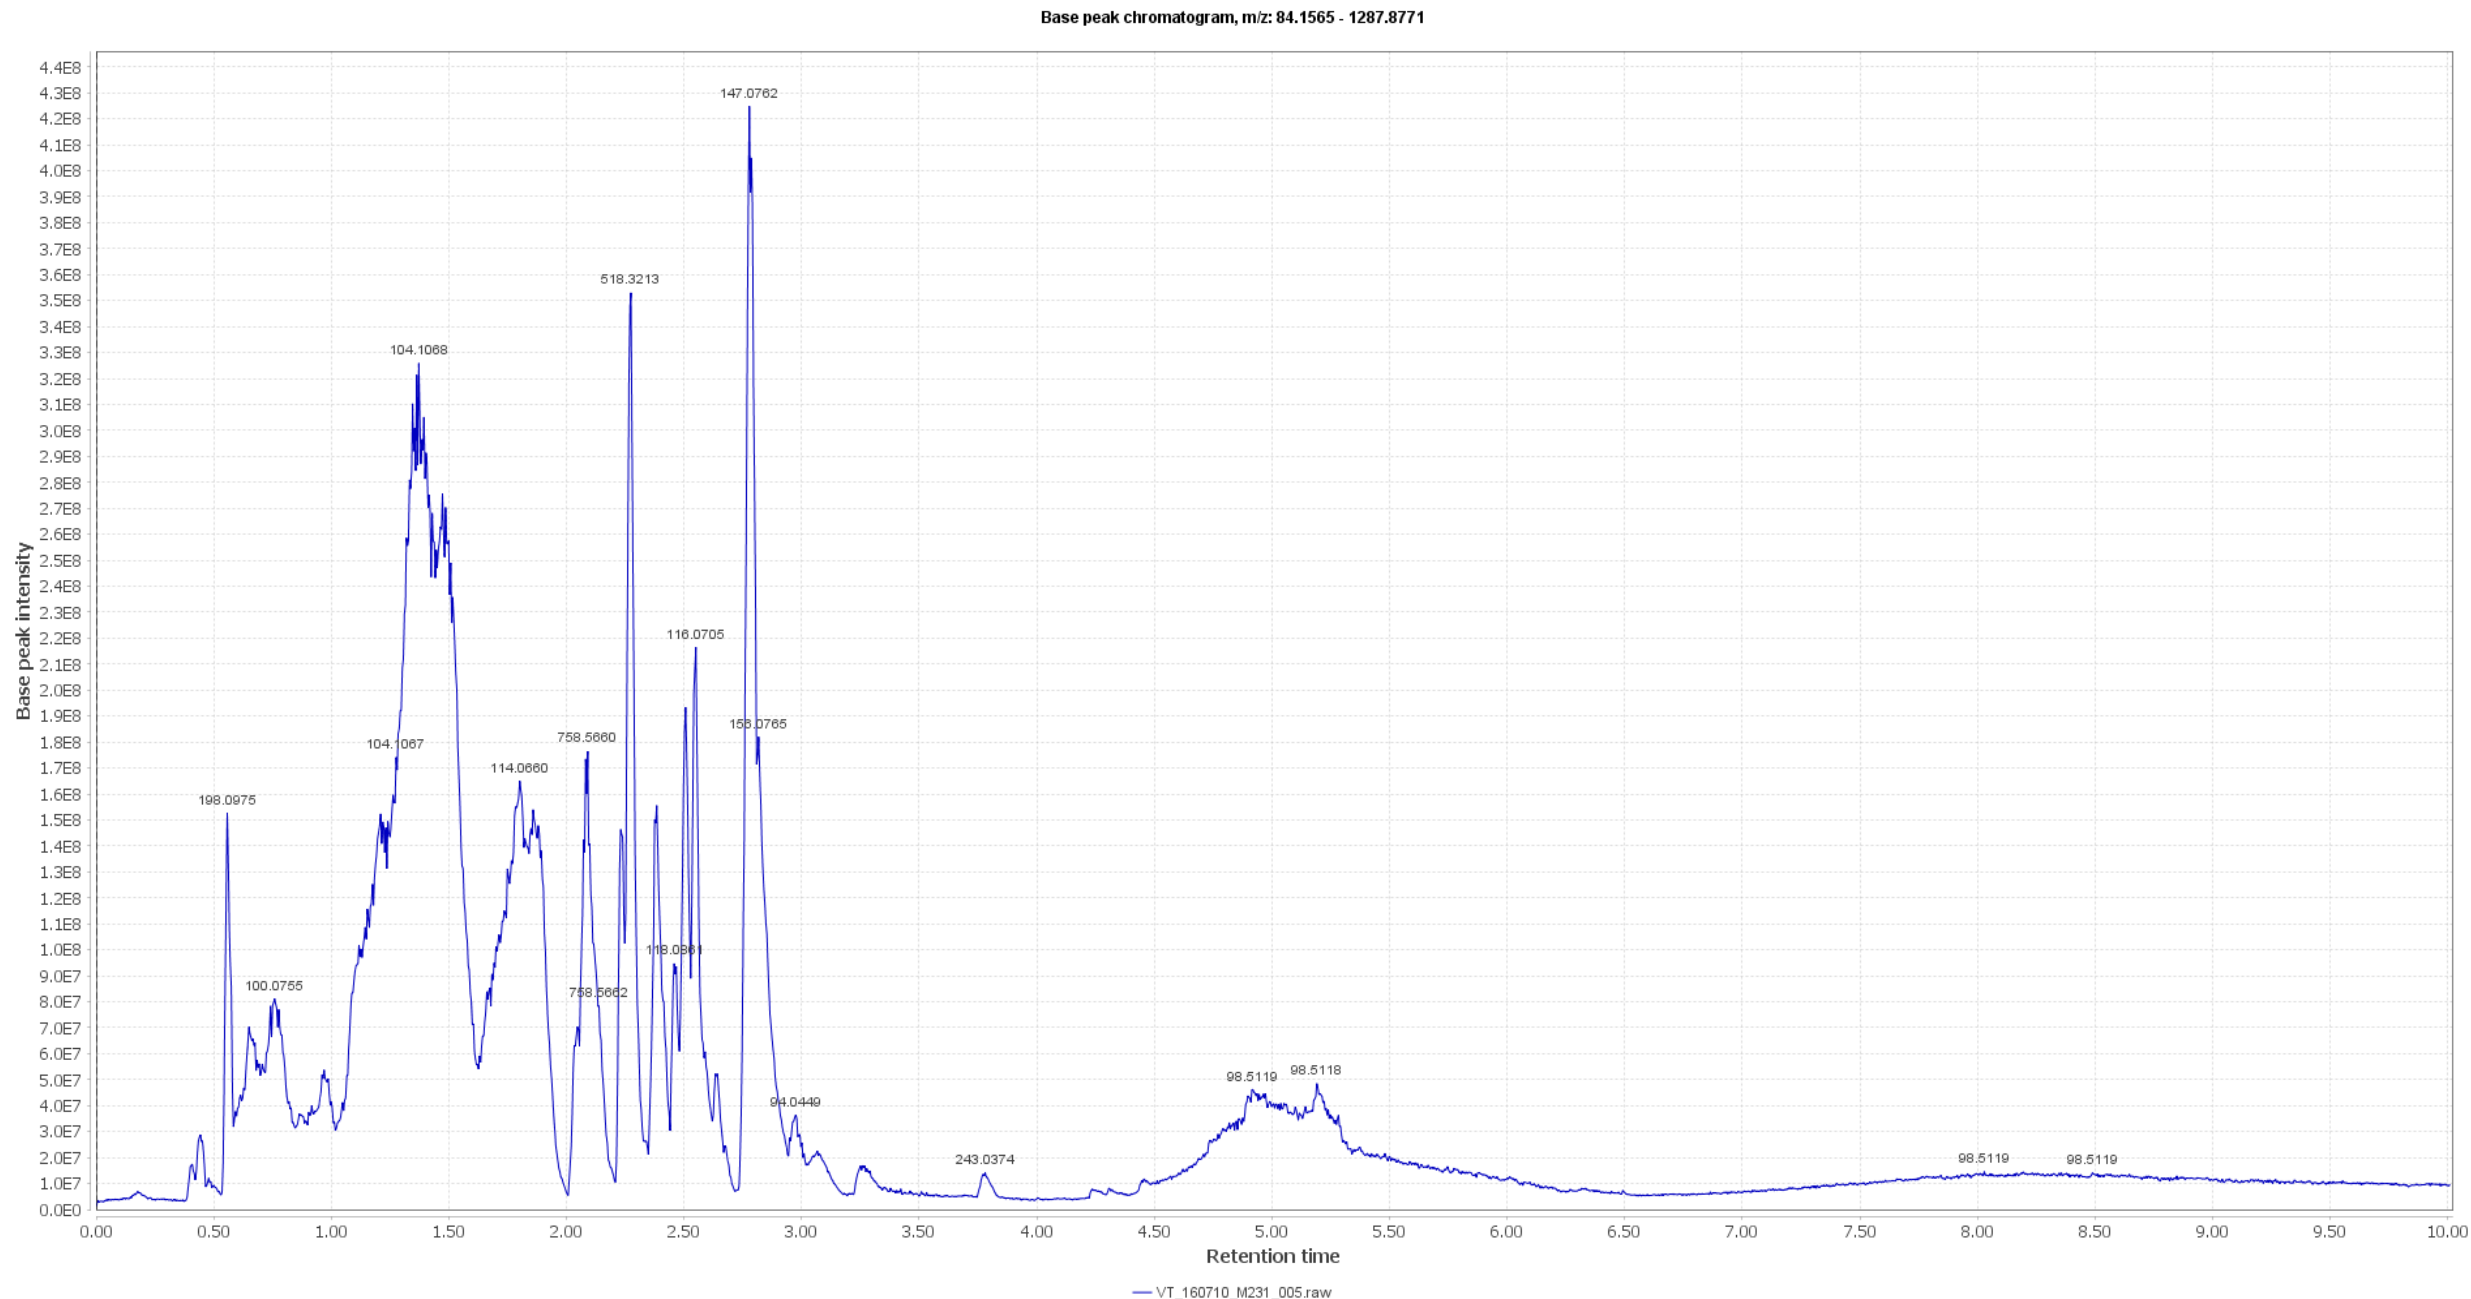

Supplementary material 6: Base peak ion chromatogram for NIST SRM1950 in negative ionization mode metabolomics data

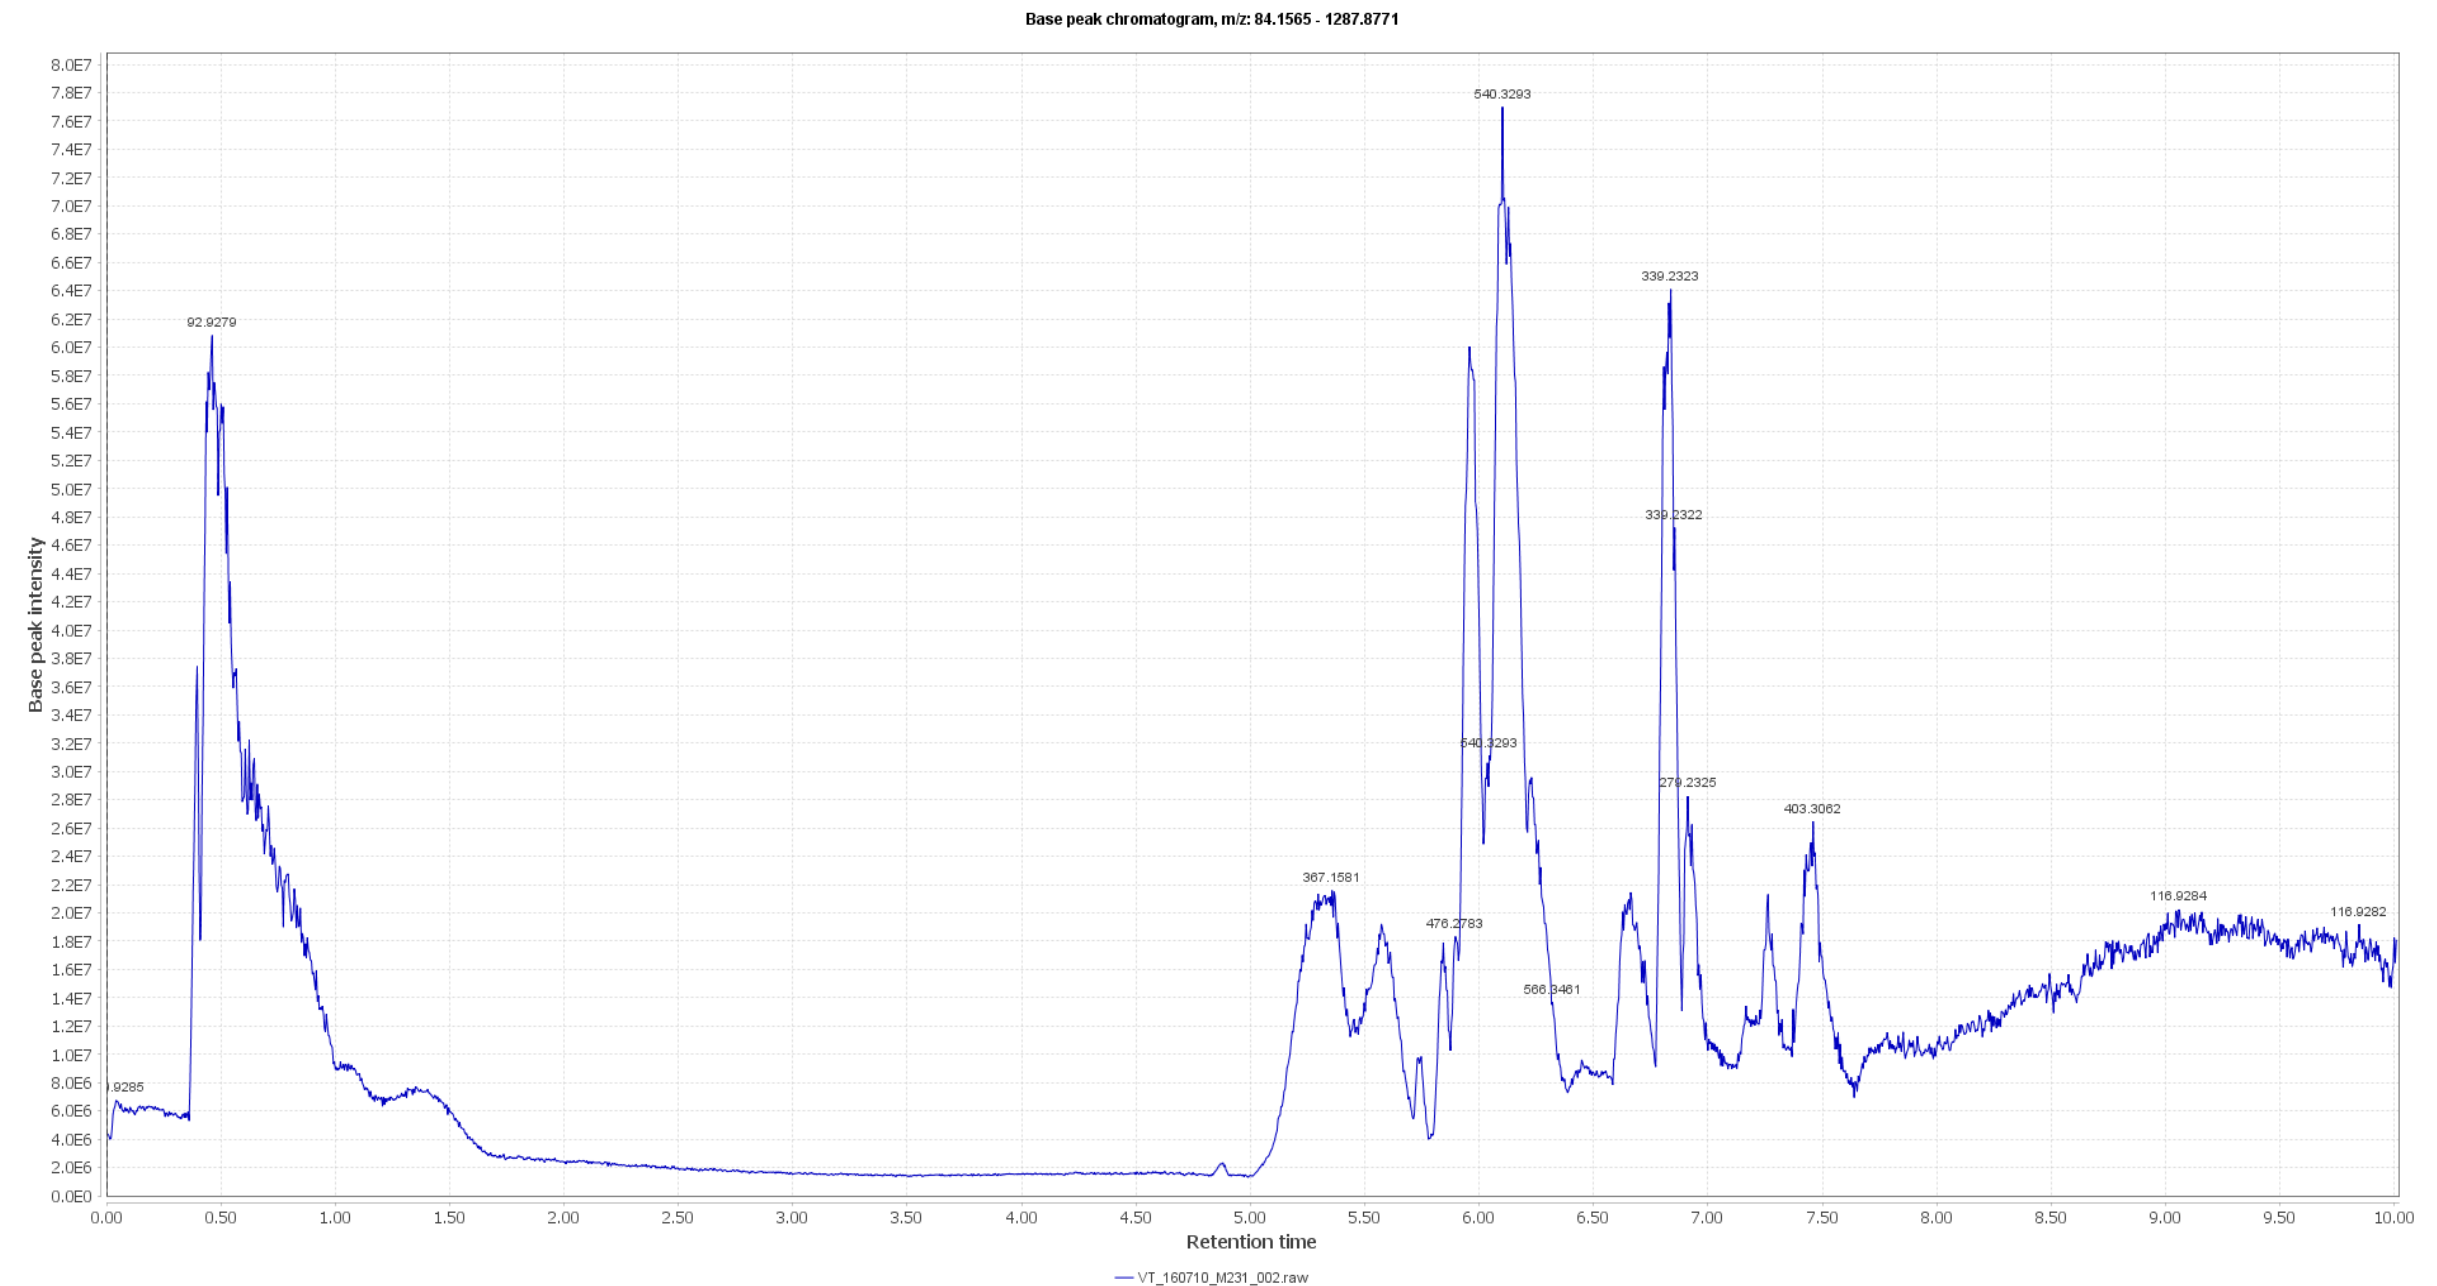

Supplementary material 6: Base peak ion chromatogram for pooled plasma in positive ionization mode metabolomics data

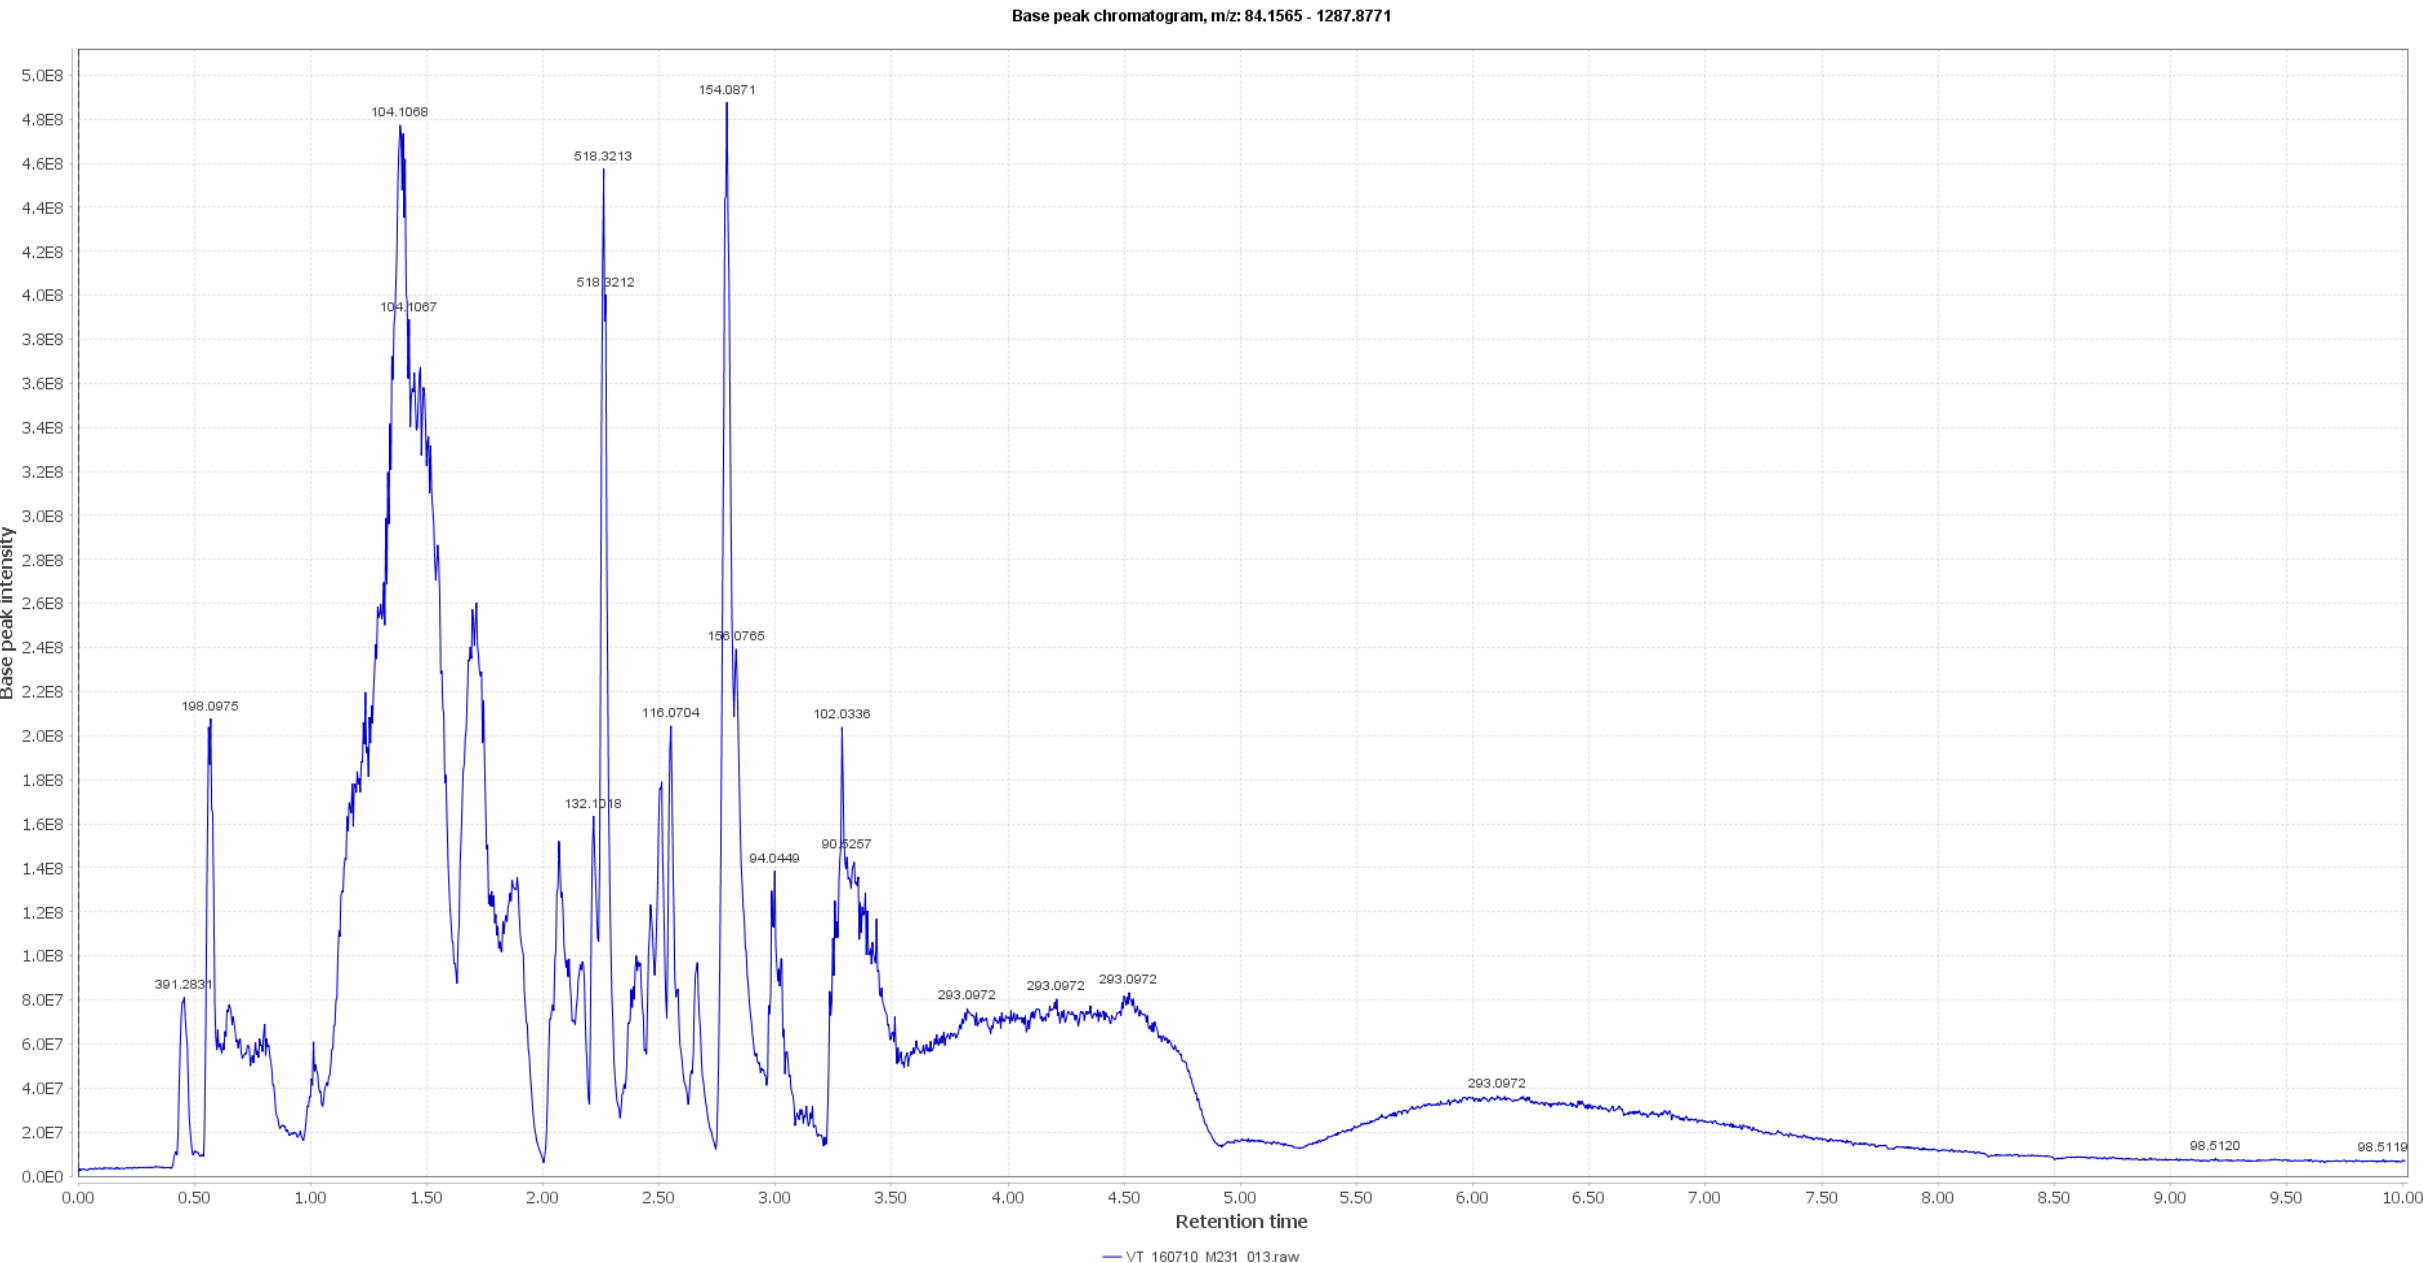

Supplementary material 6: Base peak ion chromatogram for pooled plasma in negative ionization mode metabolomics data

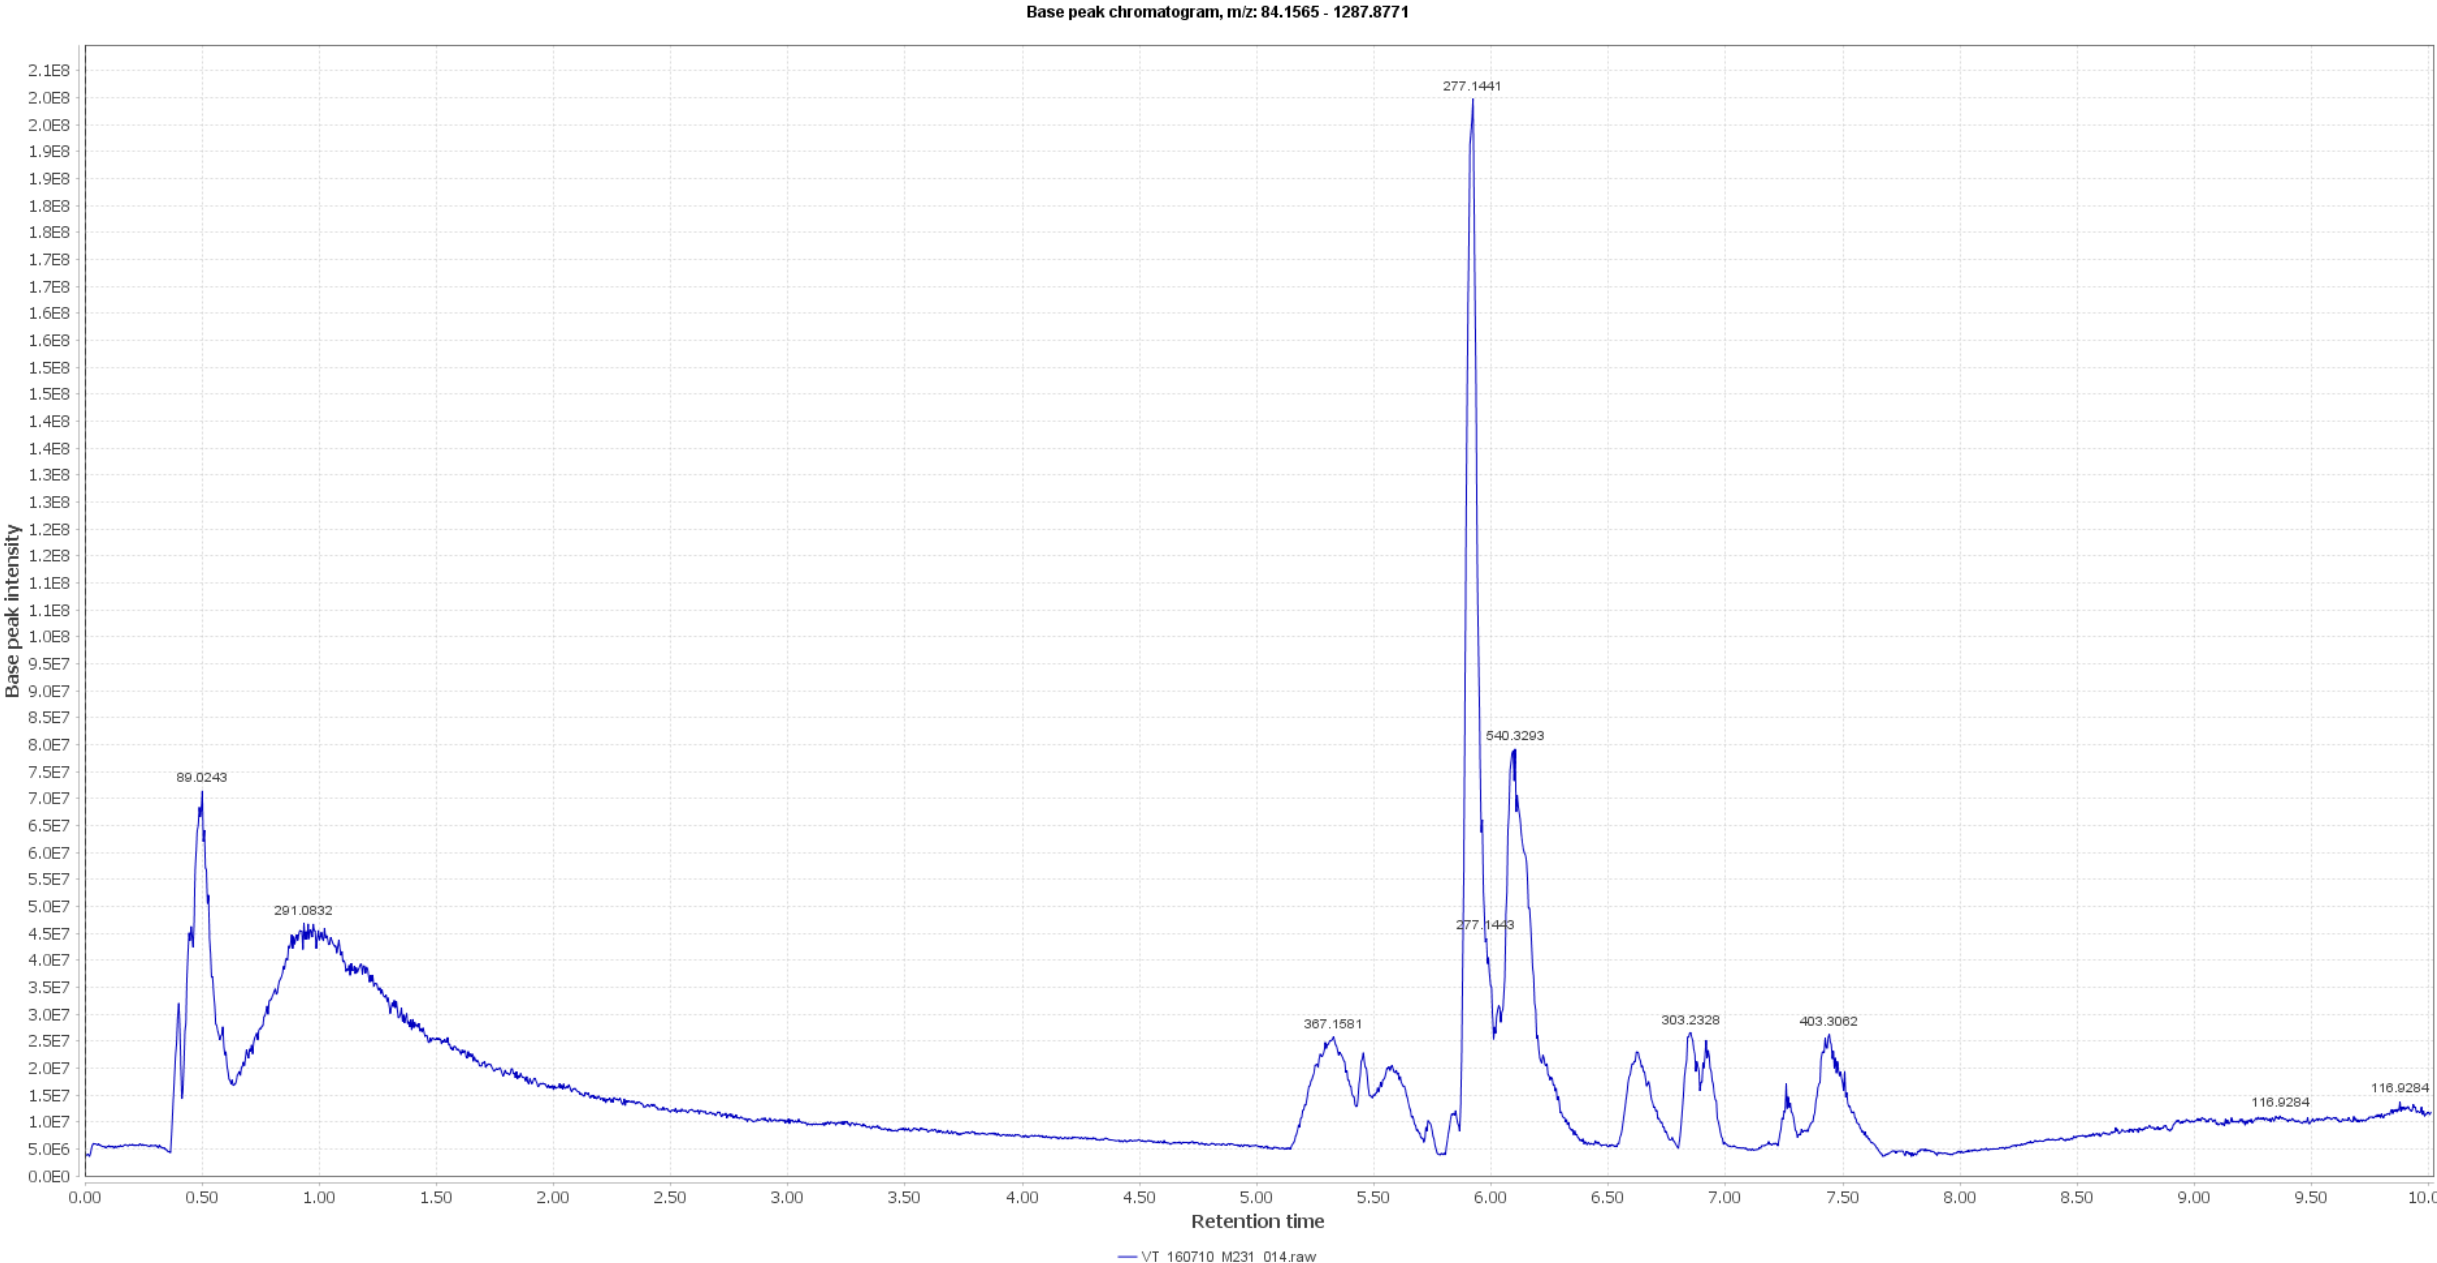

Supplement: s1 [file s1]
